# Supplementary material for: Biosensor Approach to Psychopathology Classification
Source: PLOS journal article supplement (doi:10.1371/journal.pcbi.1000966), 2010-10-21

Constant  
Term

Return Ratio  
One Round  
Prior

Investment  
Ratio One  
Round Prior

Return Ratio  
Two Rounds  
Prior

Investment  
Ratio Two  
Rounds Prior

Cluster 1

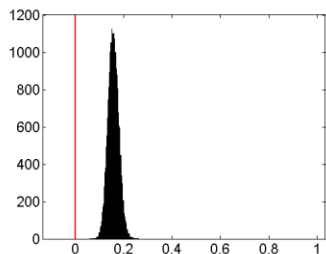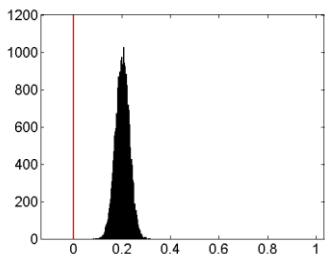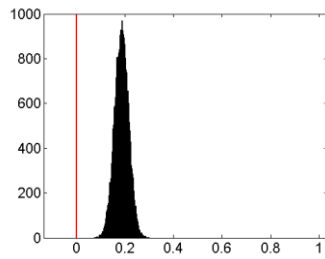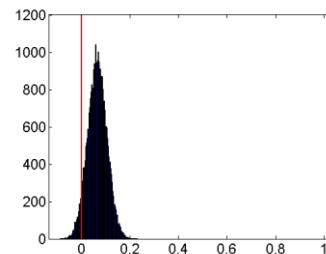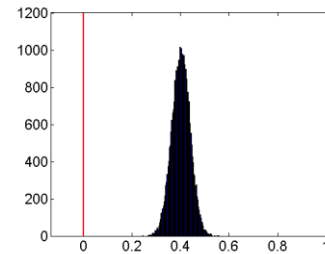

Cluster 2

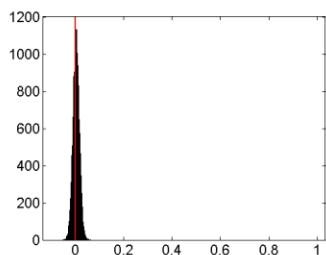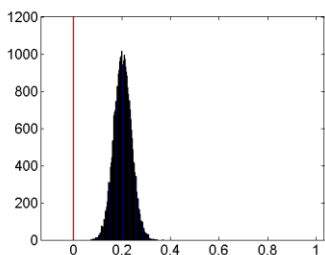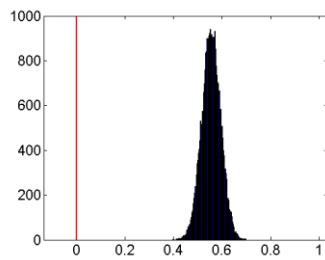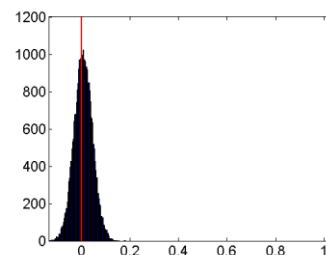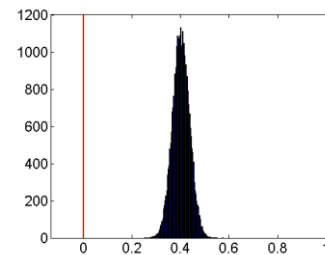

Cluster 3

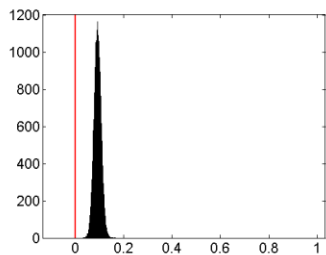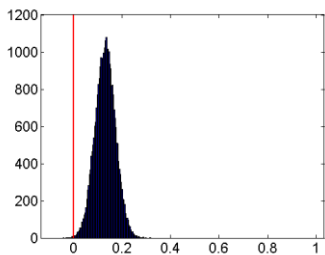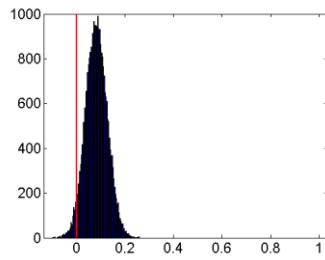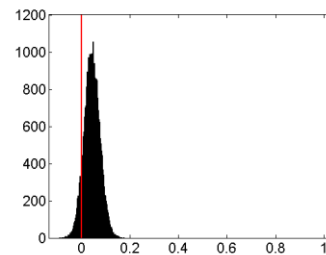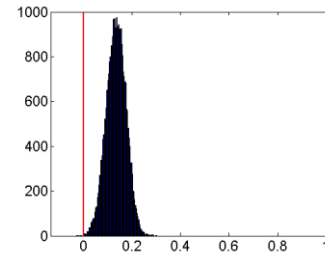

Cluster 4

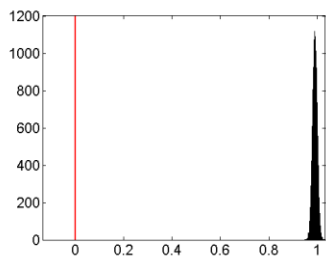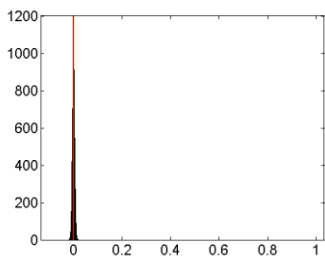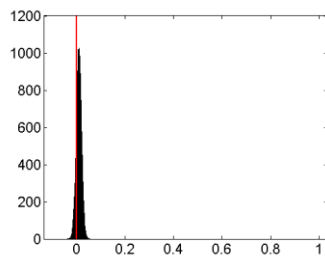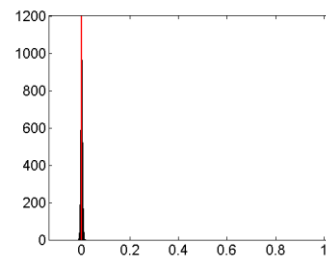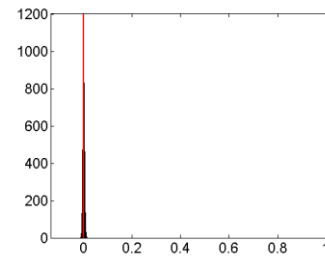

Supplement: S2 (10.1371/journal.pcbi.1000966.s002) [file journal.pcbi.1000966.s002]
