# Supplementary material for: Biosensor Approach to Psychopathology Classification
Source: PLOS journal article supplement (doi:10.1371/journal.pcbi.1000966), 2010-10-21

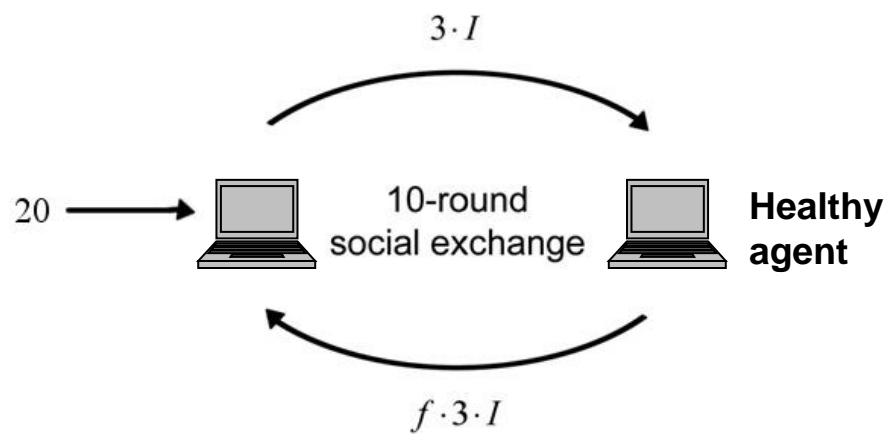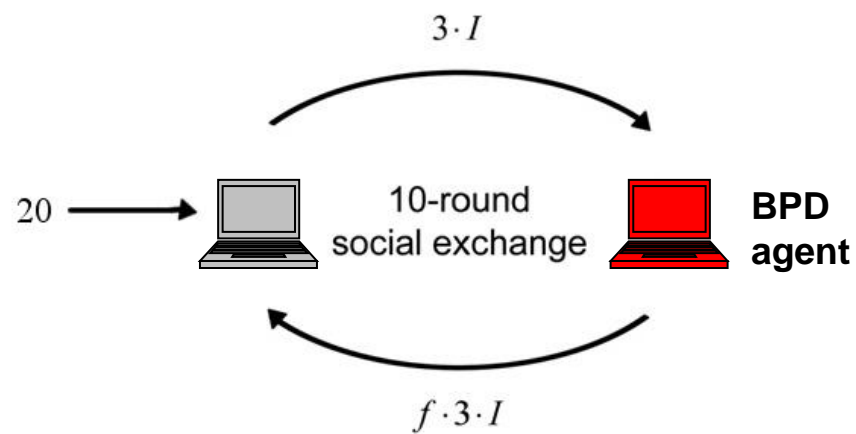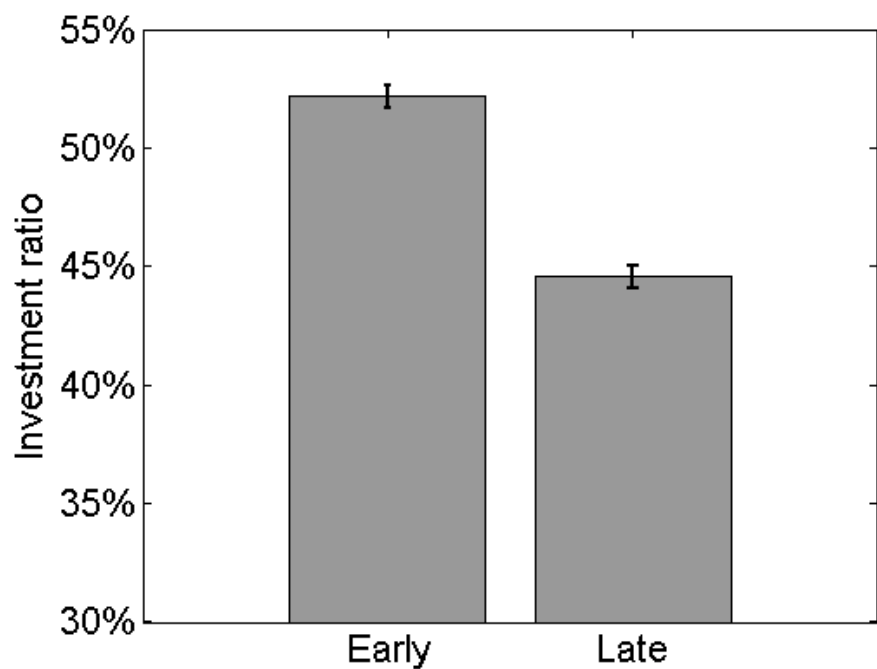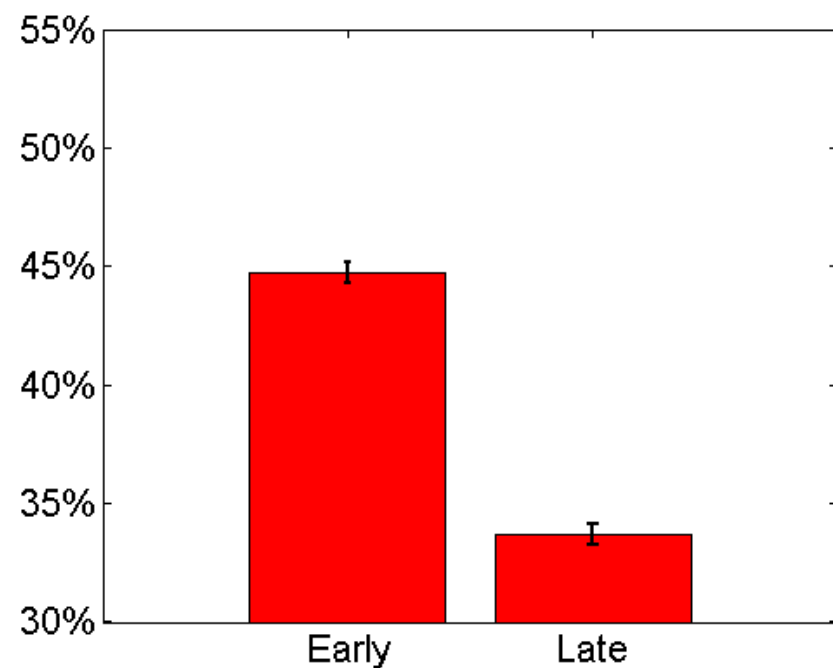

Supplement: S3 (10.1371/journal.pcbi.1000966.s003) [file journal.pcbi.1000966.s003]
